# Supplementary material
Source: publisher figshare collection journal article supplement (https://acs.figshare.com/ndownloader/files/15460490)
Supplement: Supplementary file 1 [file 15460490]

# Phosphazene Base-Mediated Azide-Alkyne Click Polymerization toward 1,5-Regioregular Polytriazoles

*Baixue Li,<sup>†</sup> Yong Liu,<sup>†</sup> Han Nie,<sup>†</sup> Anjun Qin<sup>\*†</sup> and Ben Zhong Tang<sup>\*†‡</sup>*

<sup>†</sup> State Key Laboratory of Luminescent Materials and Devices, Center for Aggregation-Induced Emission, South China University of Technology, Guangzhou 510640, China.

<sup>‡</sup> Department of Chemistry, Hong Kong Branch of Chinese National Engineering Research Center for Tissue Restoration and Reconstruction, Institute for Advanced Study, and Department of Chemical and Biological Engineering, The Hong Kong University of Science & Technology, Clear Water Bay, Kowloon, Hong Kong, China.

## Table of Contents

|                                                                                                                                                         |     |
|---------------------------------------------------------------------------------------------------------------------------------------------------------|-----|
| Synthesis procedures of monomers <b>1a</b> and <b>1b</b> .                                                                                              | S5  |
| Synthesis procedures of monomers <b>2a-2c</b> .                                                                                                         | S6  |
| <b>Figure S1.</b> TGA curves of PI-PVI. $T_d$ presents the temperature of 5% weight loss.                                                               | S6  |
| <b>Figure S2.</b> FT-IR spectra of <b>1a</b> (A), <b>2b</b> (B) and PII (C).                                                                            | S7  |
| <b>Figure S3.</b> FT-IR spectra of <b>1a</b> (A), <b>2c</b> (B) and PIII (C).                                                                           | S7  |
| <b>Figure S4.</b> FT-IR spectra of <b>1b</b> (A), <b>2a</b> (B) and PIV (C).                                                                            | S8  |
| <b>Figure S5.</b> FT-IR spectra of <b>1b</b> (A), <b>2b</b> (B) and PV (C).                                                                             | S8  |
| <b>Figure S6.</b> FT-IR spectra of <b>1b</b> (A), <b>2c</b> (B) and PVI (C).                                                                            | S9  |
| <b>Figure S7.</b> $^1\text{H}$ NMR spectra of <b>2b</b> (A), <b>1a</b> (B) and PII (C) in DMSO- $d_6$ . The solvent peaks are marked with asterisks.    | S10 |
| <b>Figure S8.</b> $^1\text{H}$ NMR spectra of <b>2c</b> (A), <b>1a</b> (B) and PIII (C) in DMSO- $d_6$ . The solvent peaks are marked with asterisks.   | S11 |
| <b>Figure S9.</b> $^1\text{H}$ NMR spectra of <b>2a</b> (A), <b>1b</b> (B) and PIV (C) in DMSO- $d_6$ . The solvent peaks are marked with asterisks.    | S12 |
| <b>Figure S10.</b> $^1\text{H}$ NMR spectra of <b>2b</b> (A), <b>1b</b> (B) and PV (C) in DMSO- $d_6$ . The solvent peaks are marked with asterisks.    | S13 |
| <b>Figure S11.</b> $^1\text{H}$ NMR spectra of <b>2c</b> (A), <b>1b</b> (B) and PVI (C) in DMSO- $d_6$ . The solvent peaks are marked with asterisks.   | S14 |
| <b>Figure S12.</b> $^{13}\text{C}$ NMR spectra of <b>2a</b> (A), <b>1a</b> (B) and PI (C) in DMSO- $d_6$ . The solvent peaks are marked with asterisks. | S15 |
| <b>Figure S13.</b> $^{13}\text{C}$ NMR spectra of <b>2b</b> (A), <b>1a</b> (B) and PII (C) in DMSO- $d_6$ . The solvent peaks are                       |     |

marked with asterisks. S16

**Figure S14.**  $^{13}\text{C}$  NMR spectra of **2c** (A), **1a** (B) and **PIII** (C) in  $\text{DMSO-}d_6$ . The solvent peaks are marked with asterisks. S17

**Figure S15.**  $^{13}\text{C}$  NMR spectra of **2a** (A), **1b** (B) and **PIV** (C) in  $\text{DMSO-}d_6$ . The solvent peaks are marked with asterisks. S18

**Figure S16.**  $^{13}\text{C}$  NMR spectra of **2b** (A), **1b** (B) and **PV** (C) in  $\text{DMSO-}d_6$ . The solvent peaks are marked with asterisks. S19

**Figure S17.**  $^{13}\text{C}$  NMR spectra of **2c** (A), **1b** (B) and **PVI** (C) in  $\text{DMSO-}d_6$ . The solvent peaks are marked with asterisks. S20

**Figure S18.** FT-IR spectra of **1b** (A), **2c** (B) and **PVI'** (C). S21

**Figure S19.**  $^1\text{H}$  NMR spectra of **2c** (A), **1b** (B) and **PVI'** (C) in  $\text{DMSO-}d_6$ . The solvent peaks are marked with asterisks. S22

**Figure S20.**  $^{13}\text{C}$  NMR spectra of **2c** (A), **1b** (B) and **PVI'** (C) in  $\text{DMSO-}d_6$ . The solvent peaks are marked with asterisks. S23

**Figure S21.** FT-IR spectra of **1b** (A), **2c** (B) and **PVII** (C). S24

**Figure S22.**  $^1\text{H}$  NMR spectra of **2c** (A), **1b** (B) and **PVII** (C) in  $\text{CDCl}_3$ . The solvent peaks are marked with asterisks. S25

**Figure S23.**  $^{13}\text{C}$  NMR spectra of **2c** (A), **1b** (B) and **PVII** (C) in  $\text{CDCl}_3$ . The solvent peaks are marked with asterisks. S26

**Figure S24.** TGA (A) and DSC (B) curves of **PVI'** and **PVII** at a heating rate of (A)  $20\text{ }^\circ\text{C/min}$  and (B)  $10\text{ }^\circ\text{C/min}$  under nitrogen. S26

**Figure S25.** Light refraction spectra of thin solid films of **PVI'** and **PVII**. S27

**Figure S26.** UV-vis absorption spectra of **PVI'** and **PVII** in THF solutions (A), PL spectra **PVI'** (B)

and **PVII** (C) in THF solutions. S27

**Figure S27.** Dihedral angles of **PVI'**-M and **PVII**-M. S27

**Figure S28.** Cyclic voltammograms of **PVI'** and **PVII** with an Hg/HgCl<sub>2</sub> electrode as the reference

electrode and an energy level of ferrocene of -4.40 eV as the internal standard. S28

**Table S1.** Photophysical and Calculated Results as well as thermal property of **PVI'** and **PVII**. S28

## References

## Synthesis procedures of monomers 1a and 1b.

### Synthesis of 4,4'-diazidobiphenyl (1a)

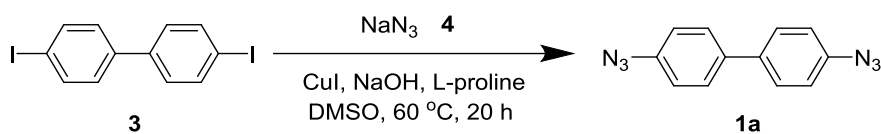

This monomer was prepared according to our previously published procedures.<sup>1</sup>

### Synthesis of 1,6-bis(4-azidophenoxy)hexane (1b)

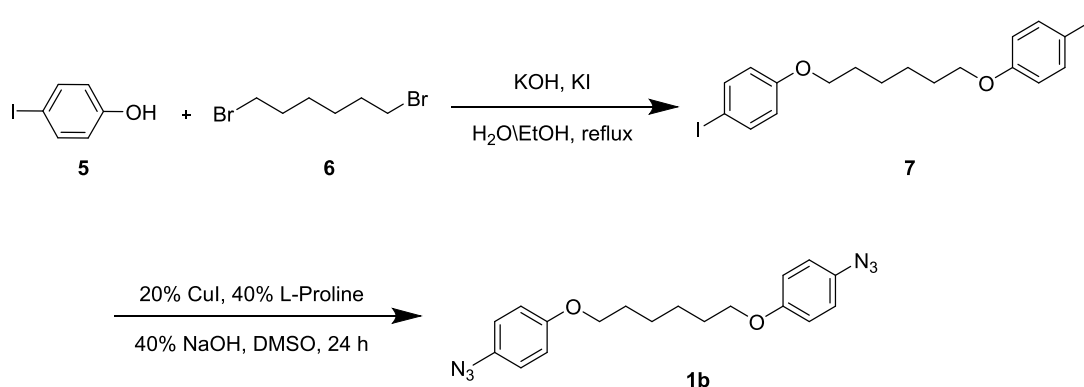

This monomer was prepared according to our previously published procedures.<sup>2</sup>

## Synthesis procedures of monomers 2a-2c.

### Synthesis of 4,4'-(Isopropylidenediphenyl)-bis(4-ethynylbenzyl) ether (2a)

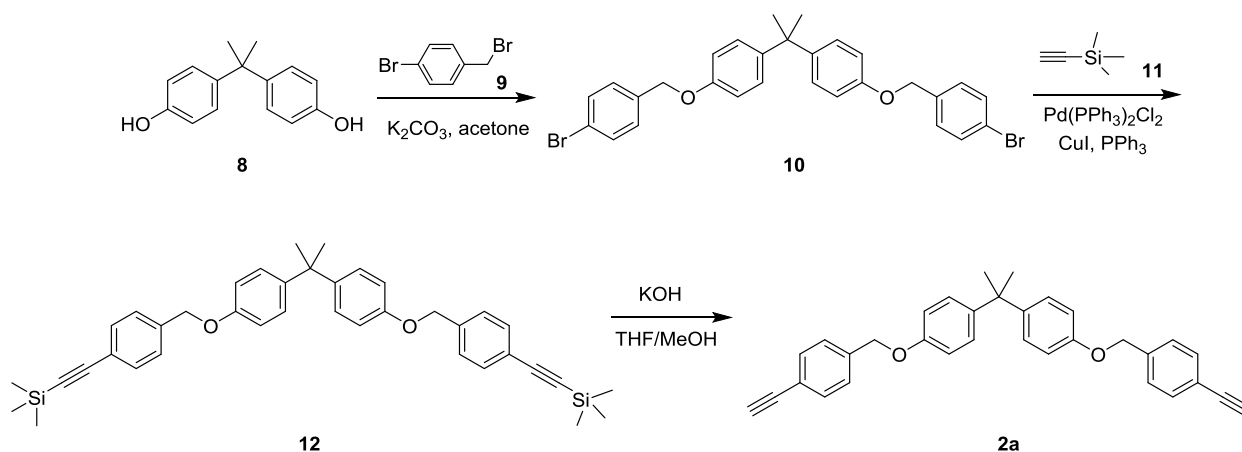

This monomer was prepared according to our previously published procedures.<sup>3,4</sup>

## Synthesis of 1,2-bis(4-ethynylphenyl)-1,2-diphenylethene (2b)

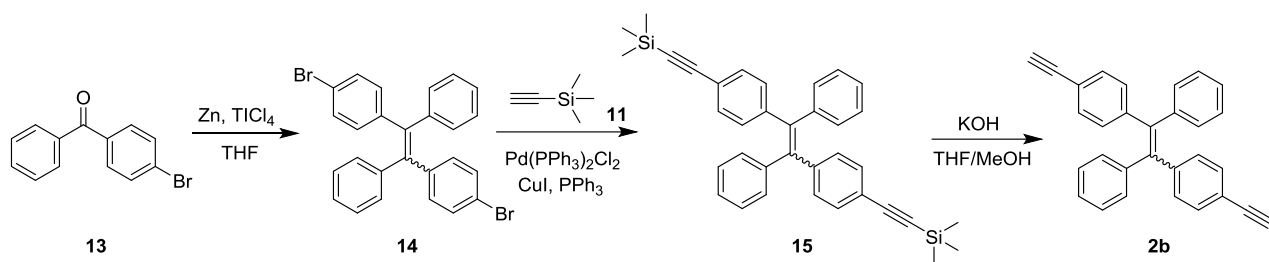

This monomer was prepared according to our previously published procedures.<sup>3,4</sup>

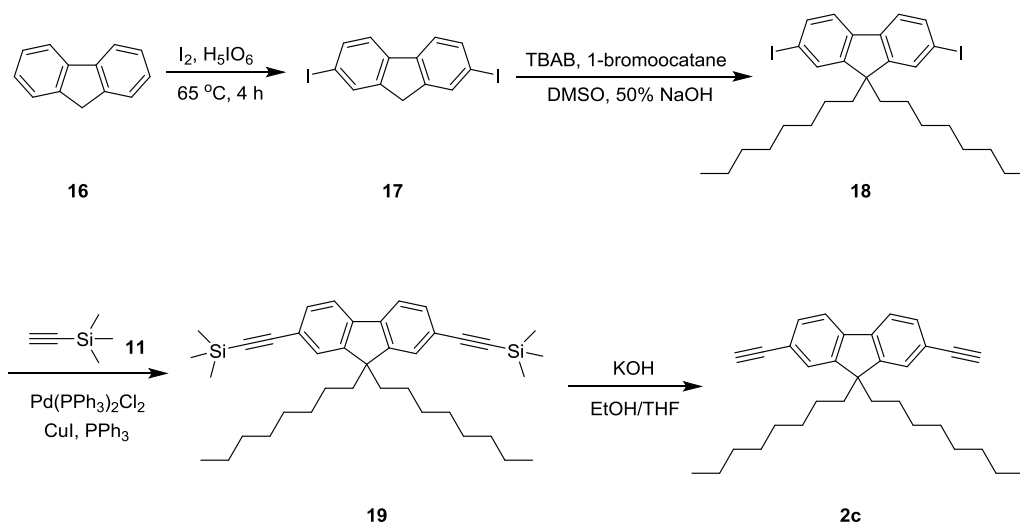

This monomer was prepared according to our previously published procedures.<sup>5</sup>

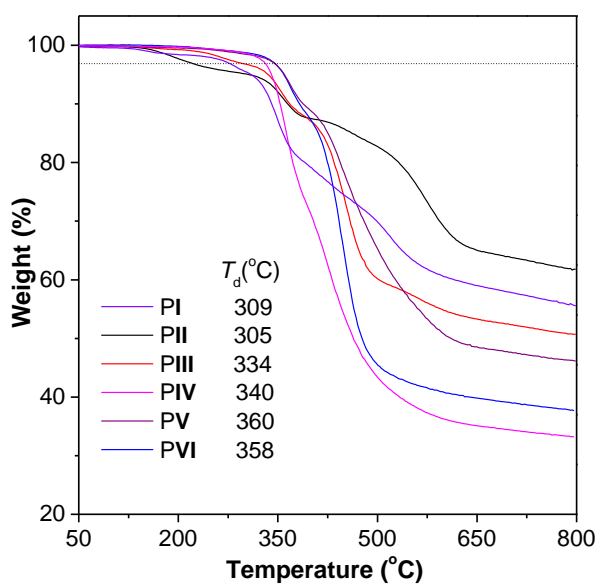

**Figure S1.** TGA curves of PI-PVI.  $T_d$  presents the temperature of 5% weight loss.

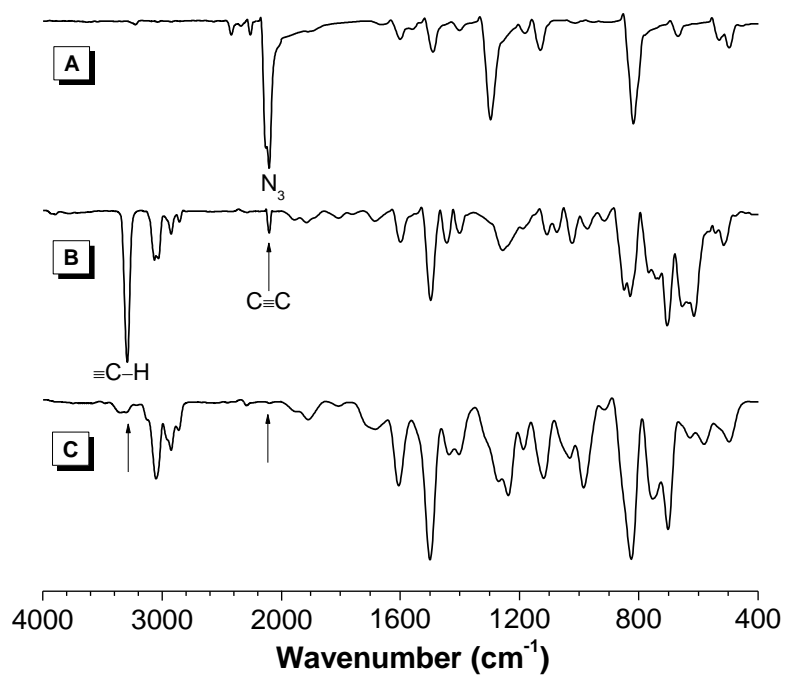

**Figure S2.** FT-IR spectra of **1a** (A), **2b** (B) and **PII** (C).

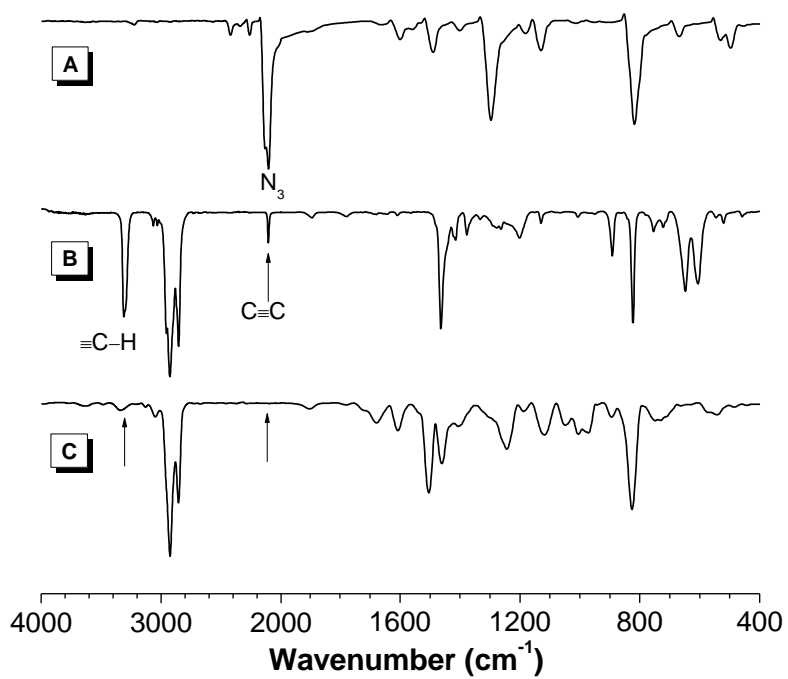

**Figure S3.** FT-IR spectra of **1a** (A), **2c** (B) and **PIII** (C).

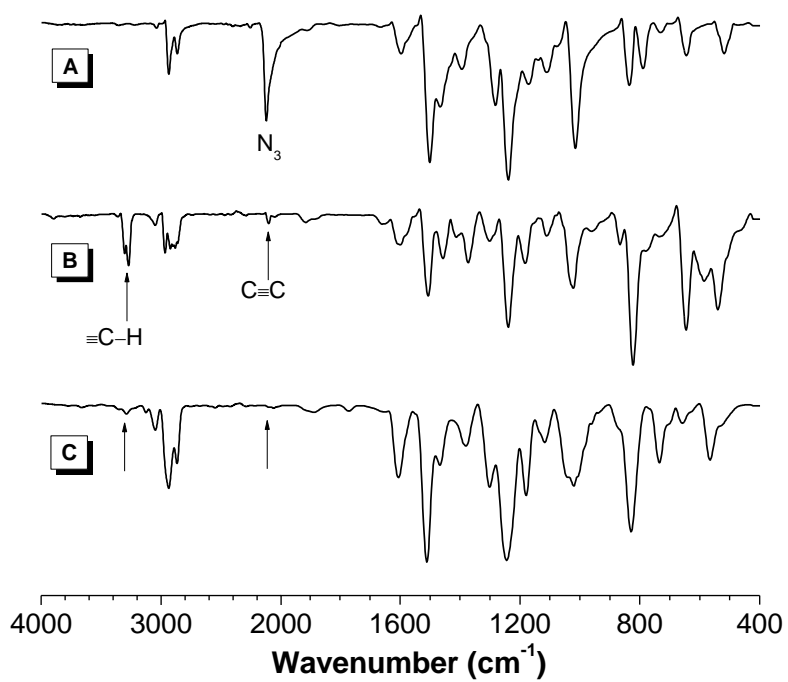

**Figure S4.** FT-IR spectra of **1b** (A), **2a** (B) and PIV (C).

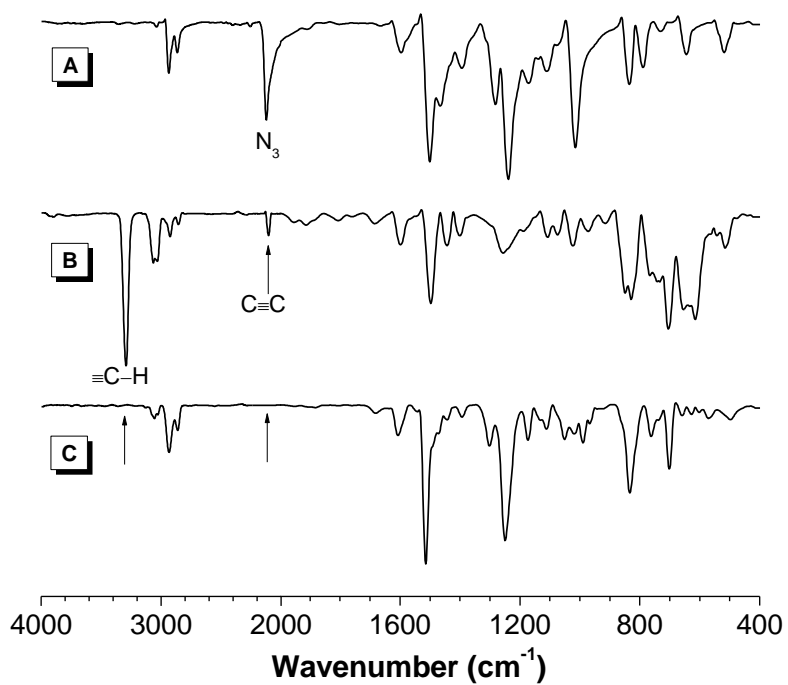

**Figure S5.** FT-IR spectra of **1b** (A), **2b** (B) and PV (C).



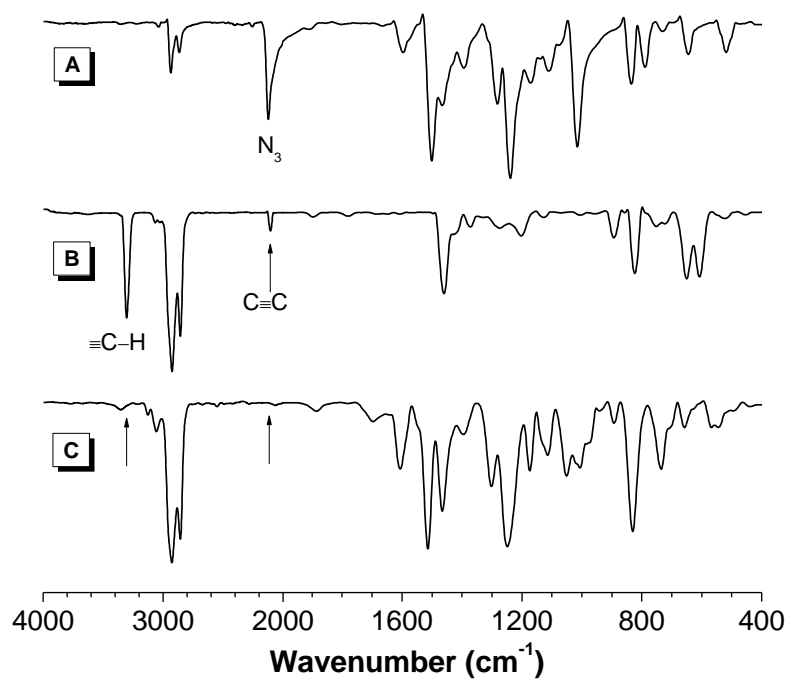

**Figure S6.** FT-IR spectra of **1b** (A), **2c** (B) and PVI (C).

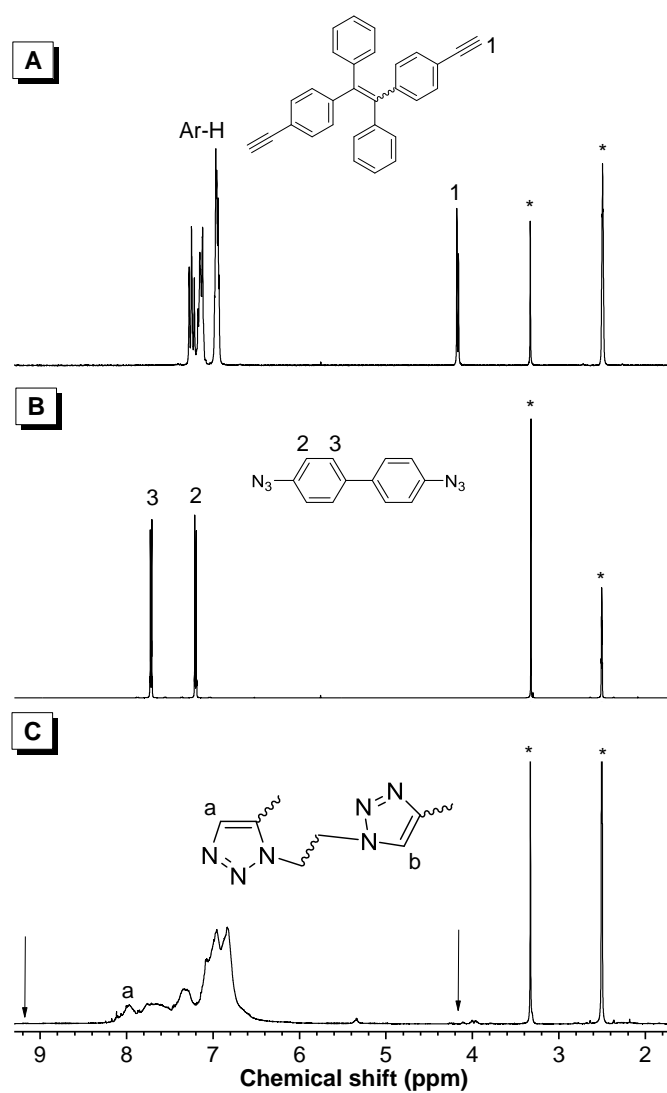

**Figure S7.**  $^1\text{H}$  NMR spectra of **2b** (A), **1a** (B) and **PII** (C) in  $\text{DMSO-}d_6$ . The solvent peaks are marked with asterisks.

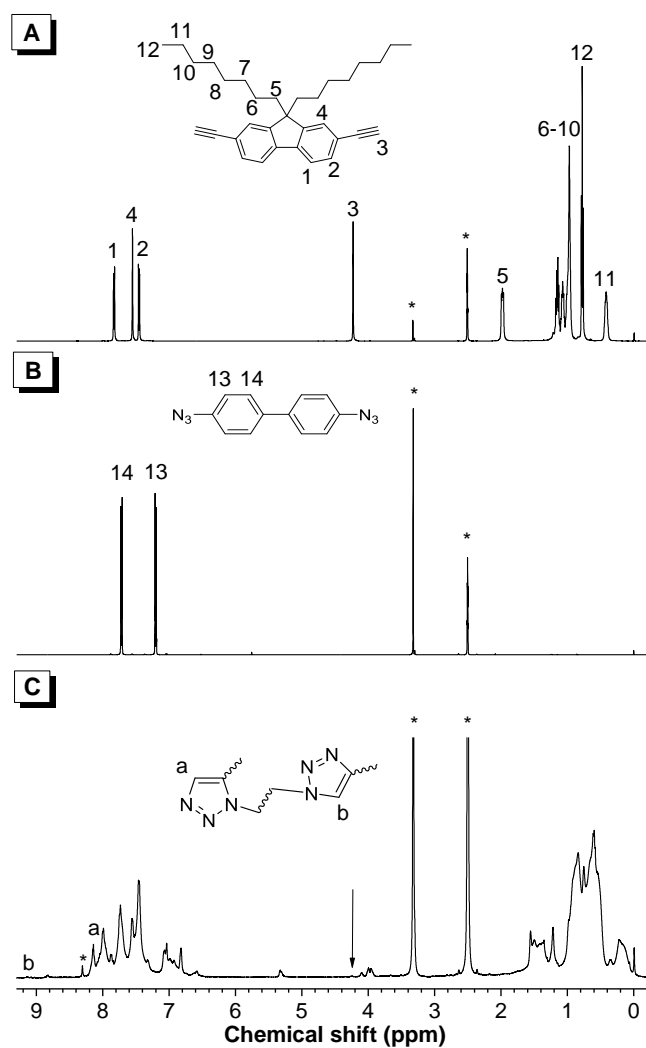

**Figure S8.**  $^1\text{H}$  NMR spectra of **2c** (A), **1a** (B) and **PIII** (C) in  $\text{DMSO-}d_6$ . The solvent peaks are marked with asterisks.

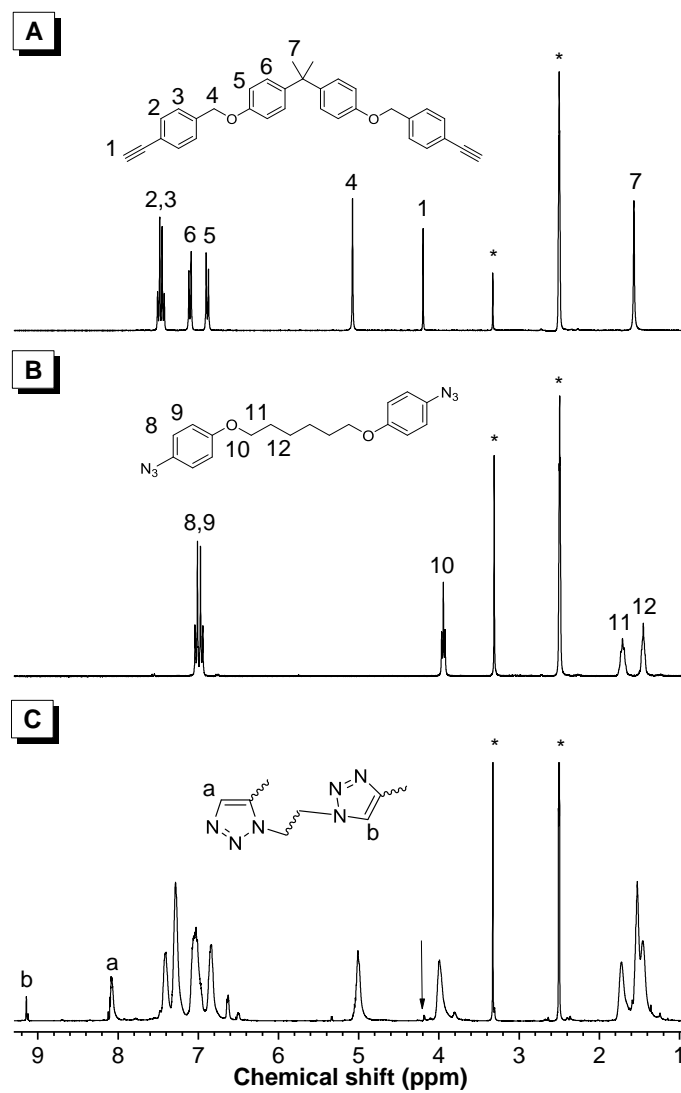

**Figure S9.**  $^1\text{H}$  NMR spectra of **2a** (A), **1b** (B) and **PIV** (C) in  $\text{DMSO-}d_6$ . The solvent peaks are marked with asterisks.

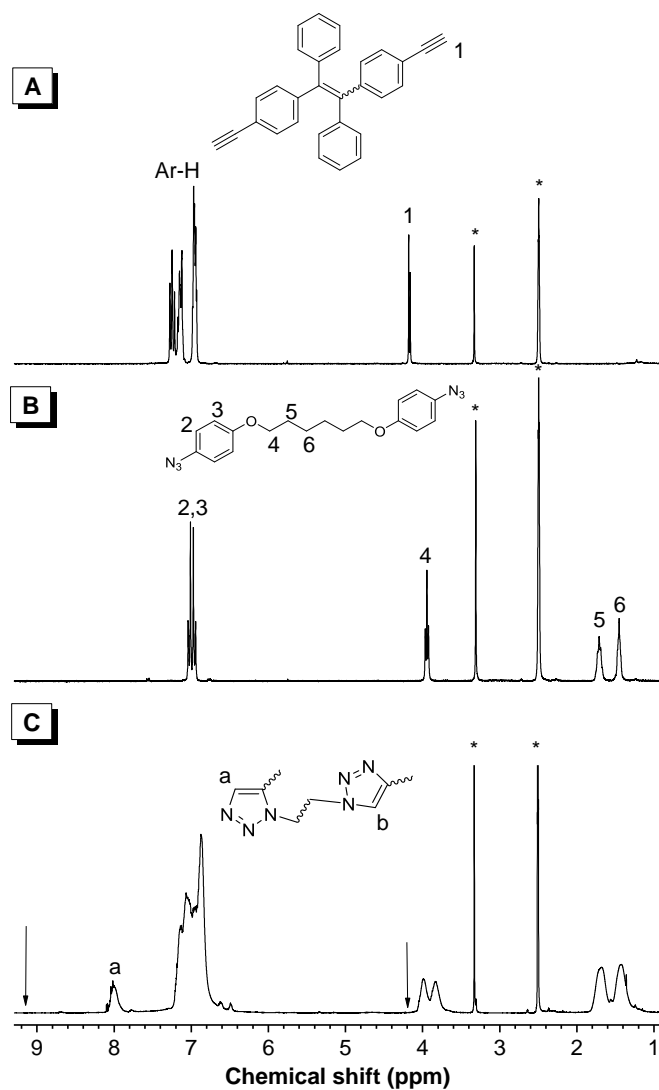

**Figure S10.**  $^1\text{H}$  NMR spectra of **2b** (A), **1b** (B) and PV (C) in  $\text{DMSO-}d_6$ . The solvent peaks are marked with asterisks.

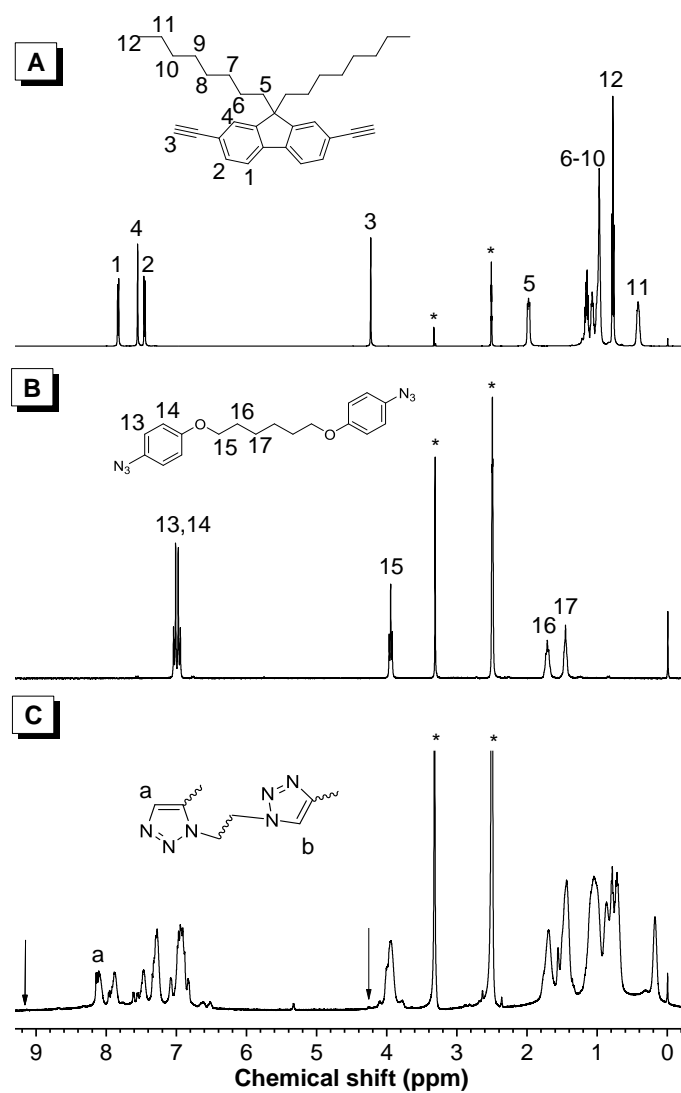

**Figure S11.**  $^1\text{H}$  NMR spectra of **2c** (A), **1b** (B) and **PVI** (C) in  $\text{DMSO-}d_6$ . The solvent peaks are marked with asterisks.

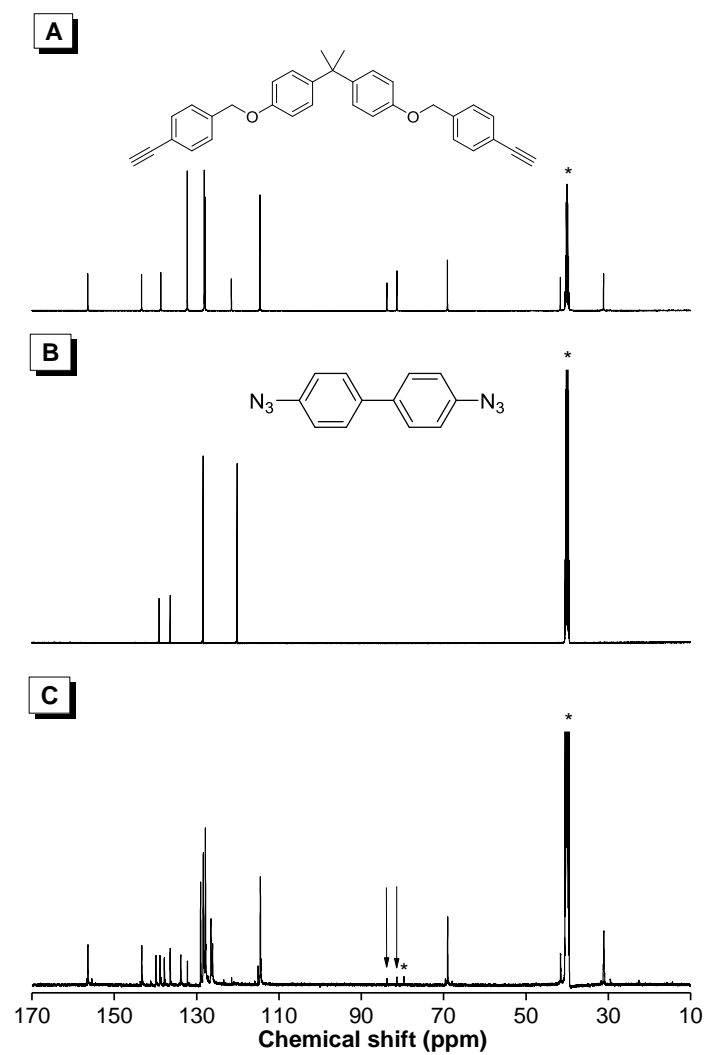

**Figure S12.**  $^{13}\text{C}$  NMR spectra of **2a** (A), **1a** (B) and **PI** (C) in  $\text{DMSO}-d_6$ . The solvent peaks are marked with asterisks.

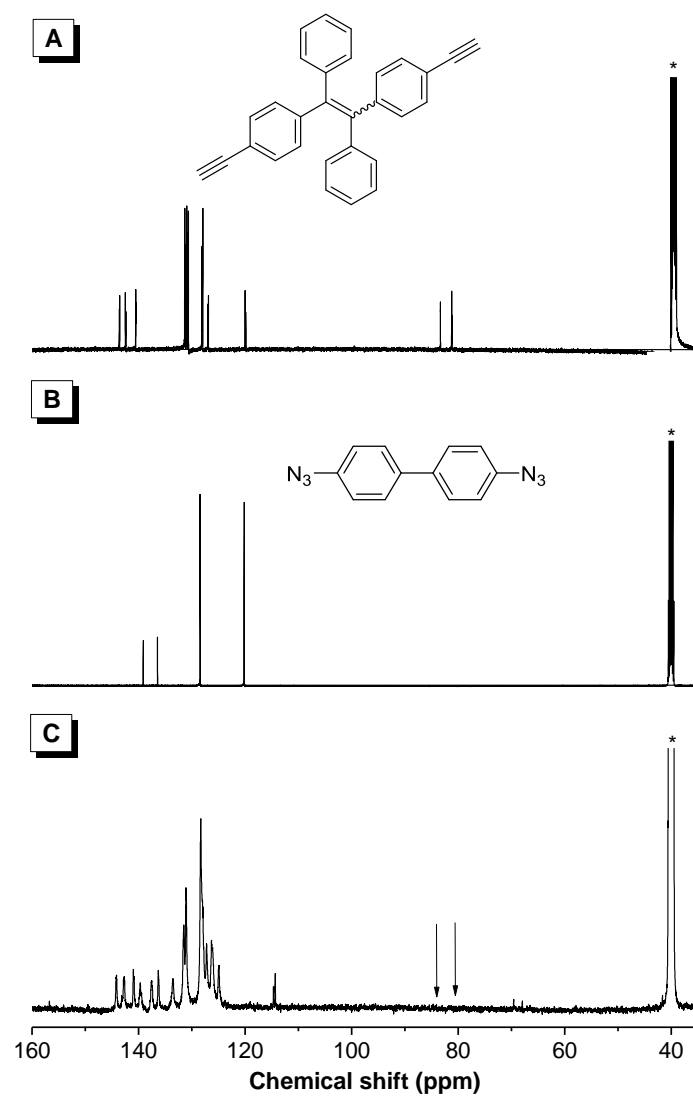

**Figure S13.**  $^{13}\text{C}$  NMR spectra of **2b** (A), **1a** (B) and **PII** (C) in  $\text{DMSO-}d_6$ . The solvent peaks are marked with asterisks.



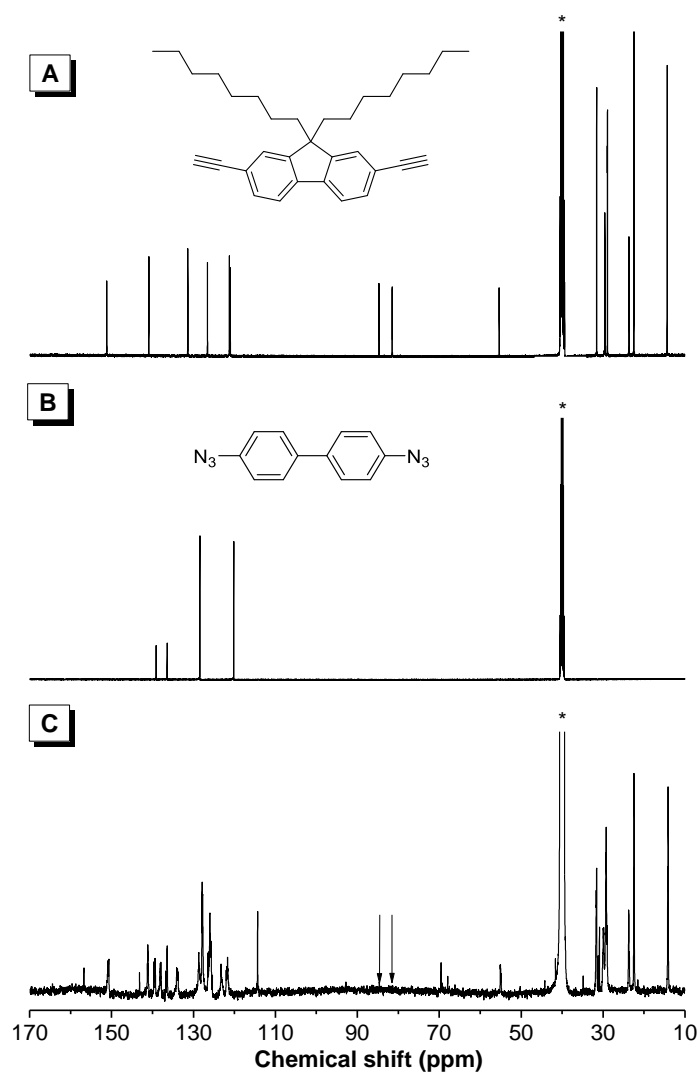

**Figure S14.**  $^{13}\text{C}$  NMR spectra of **2c** (A), **1a** (B) and **PIII** (C) in  $\text{DMSO-}d_6$ . The solvent peaks are marked with asterisks.

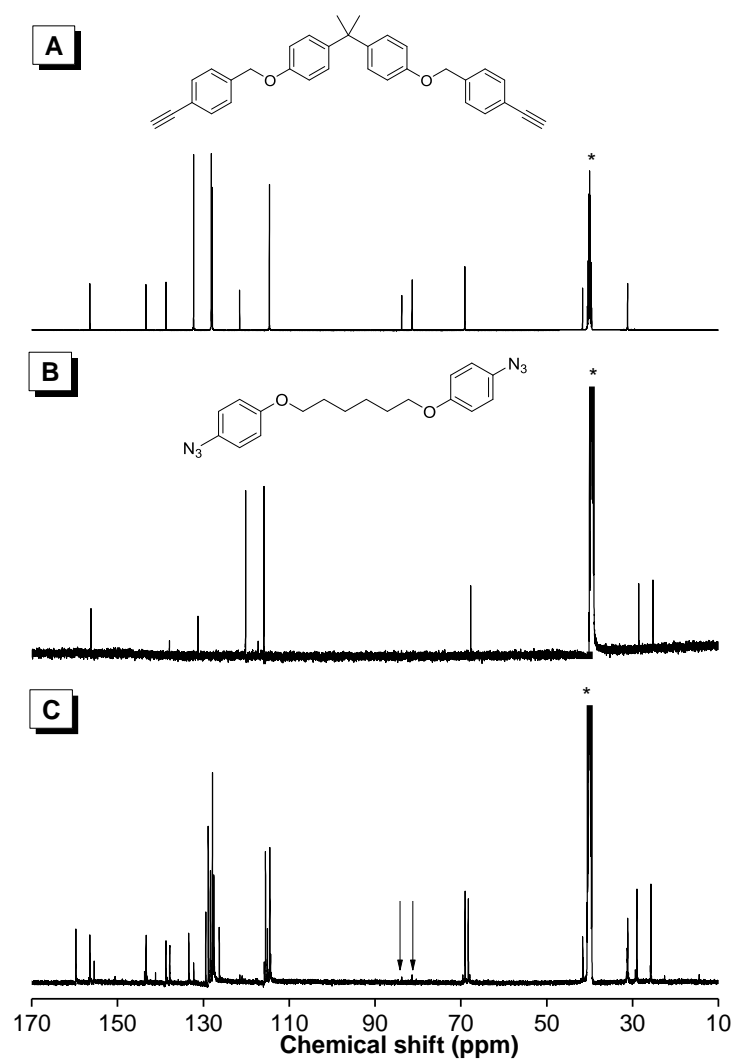

**Figure S15.**  $^{13}\text{C}$  NMR spectra of **2a** (A), **1b** (B) and PIV (C) in  $\text{DMSO-}d_6$ . The solvent peaks are marked with asterisks.

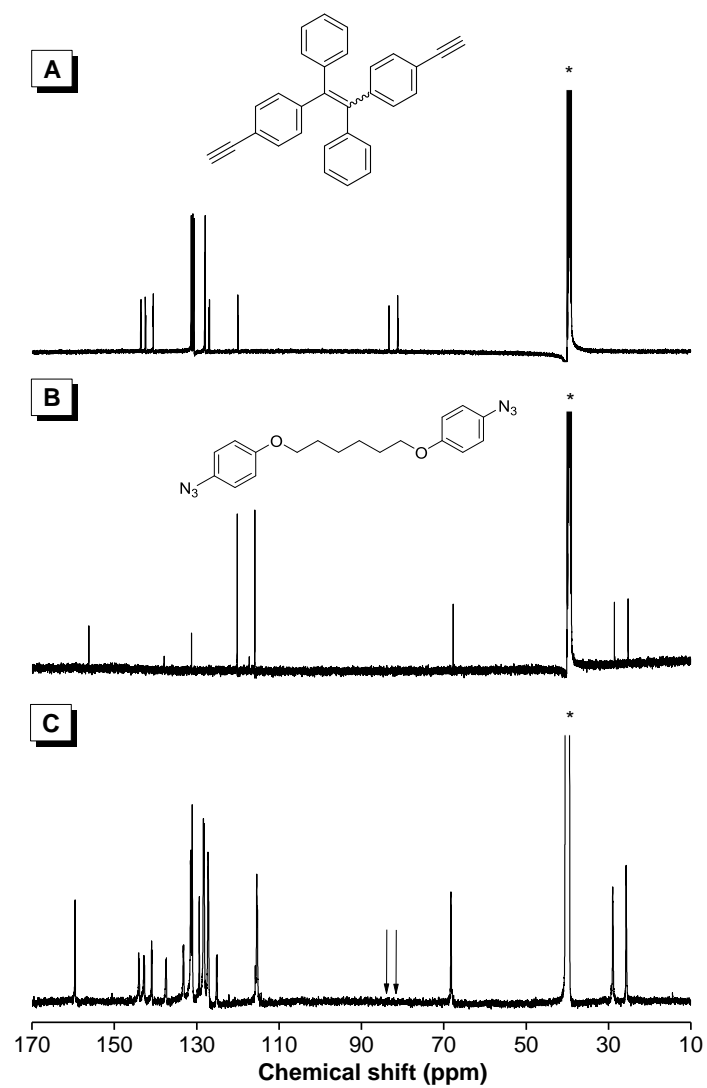

**Figure S16.**  $^{13}\text{C}$  NMR spectra of **2b** (A), **1b** (B) and PV (C) in  $\text{DMSO}-d_6$ . The solvent peaks are marked with asterisks.

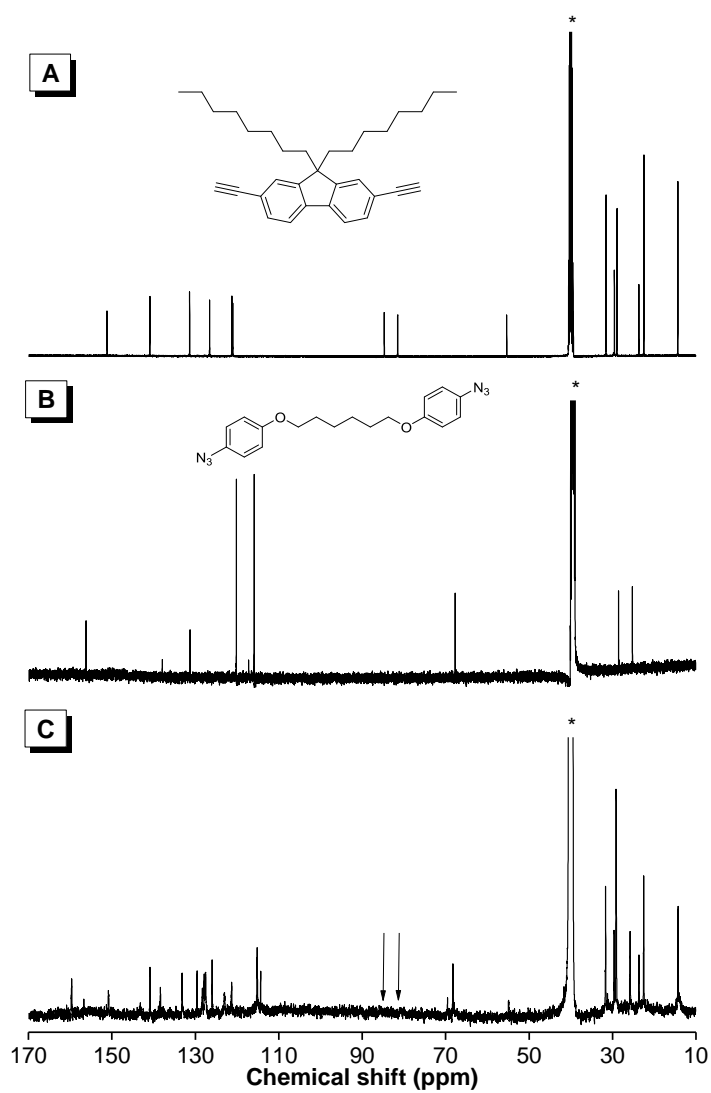

**Figure S17.**  $^{13}\text{C}$  NMR spectra of **2c** (A), **1b** (B) and PVI (C) in  $\text{DMSO-}d_6$ . The solvent peaks are marked with asterisks.

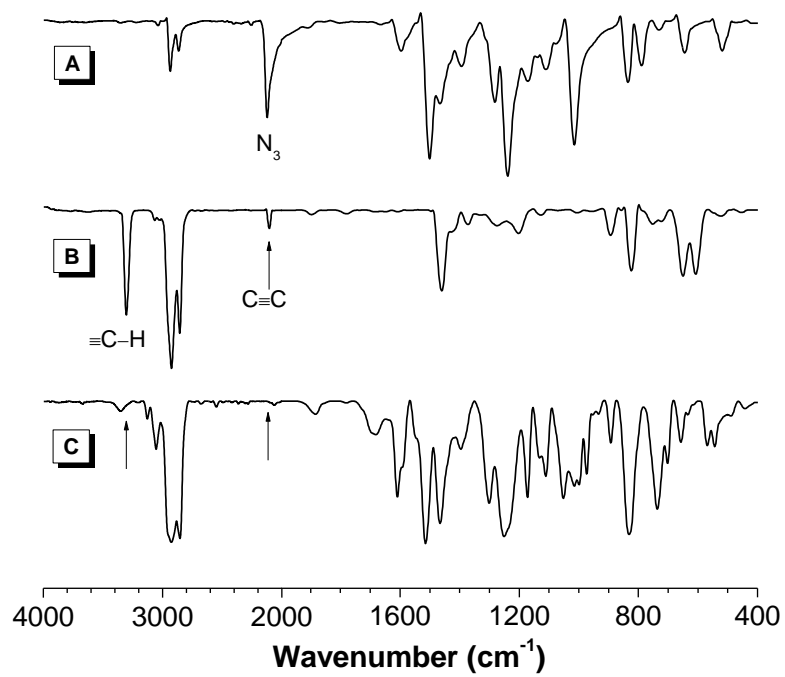

**Figure S18.** FT-IR spectra of **1b** (A), **2c** (B) and **PVI'** (C).

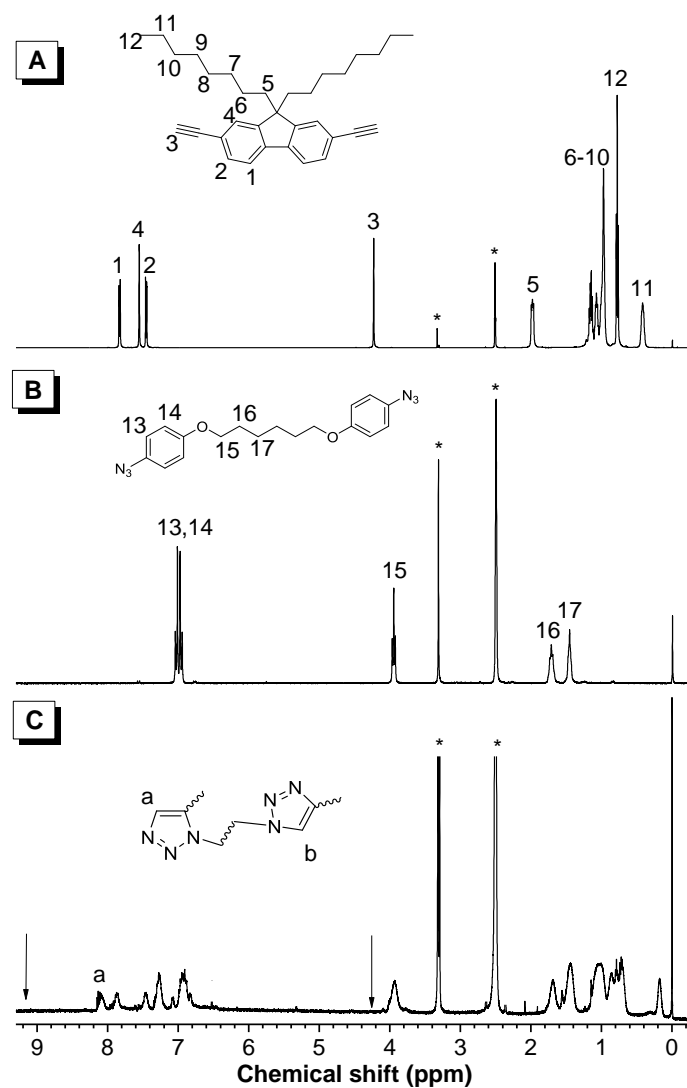

**Figure S19.**  $^1\text{H}$  NMR spectra of **2c** (A), **1b** (B) and **PVI'** (C) in  $\text{DMSO}-d_6$ . The solvent peaks are marked with asterisks.

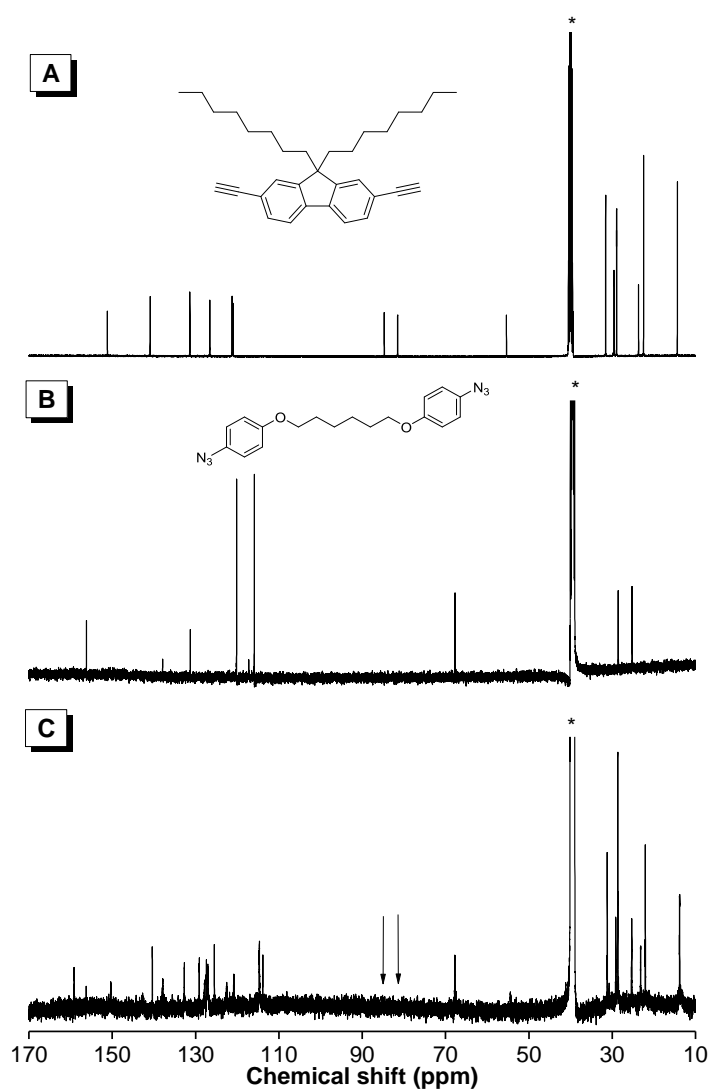

**Figure S20.**  $^{13}\text{C}$  NMR spectra of **2c** (A), **1b** (B) and **PVI'** (C) in  $\text{DMSO}-d_6$ . The solvent peaks are marked with asterisks.

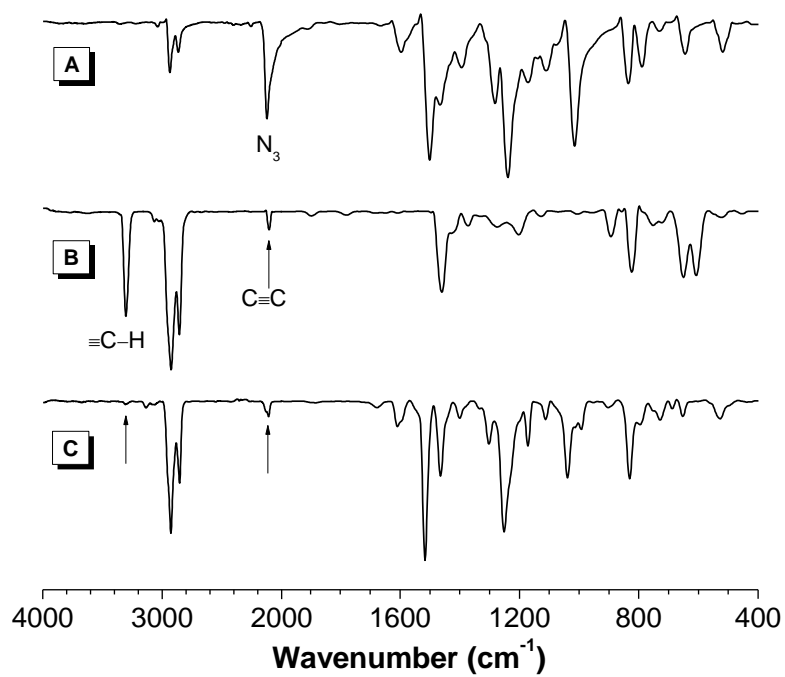

**Figure S21.** FT-IR spectra of **1b** (A), **2c** (B) and **PVII** (C).



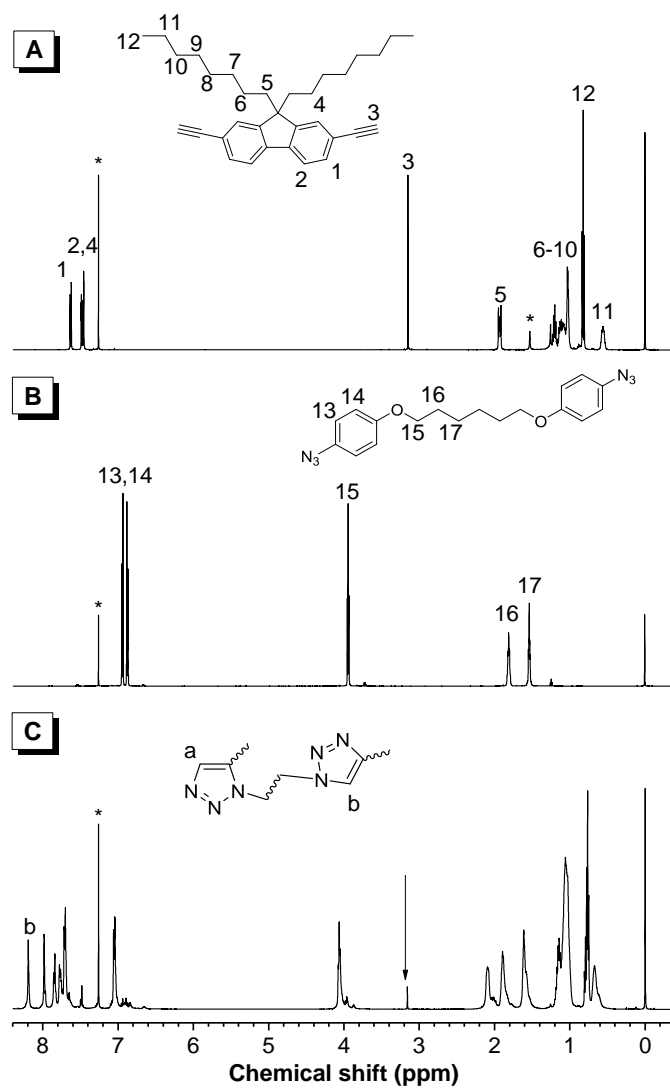

**Figure S22.**  $^1\text{H}$  NMR spectra of **2c** (A), **1b** (B) and **PVII** (C) in  $\text{CDCl}_3$ . The solvent peaks are marked with asterisks.

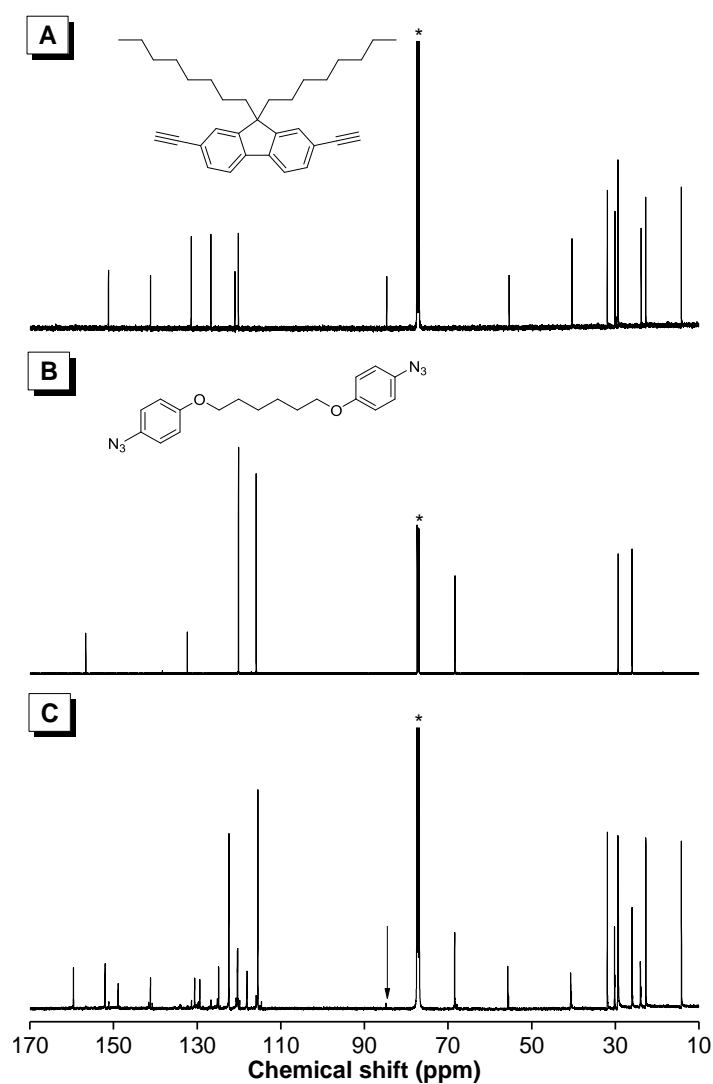

**Figure S23.**  $^{13}\text{C}$  NMR spectra of **2c** (A), **1b** (B) and **PVII** (C) in  $\text{CDCl}_3$ . The solvent peaks are marked with asterisks.

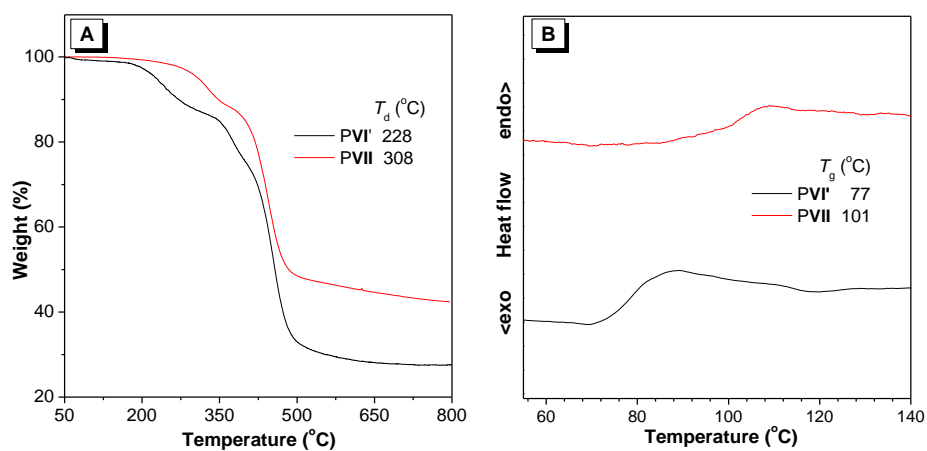

**Figure S24.** TGA (A) and DSC (B) curves of **PVI'** and **PVII** at a heating rate of (A) 20  $^{\circ}\text{C}/\text{min}$  and (B) 10  $^{\circ}\text{C}/\text{min}$  under nitrogen.

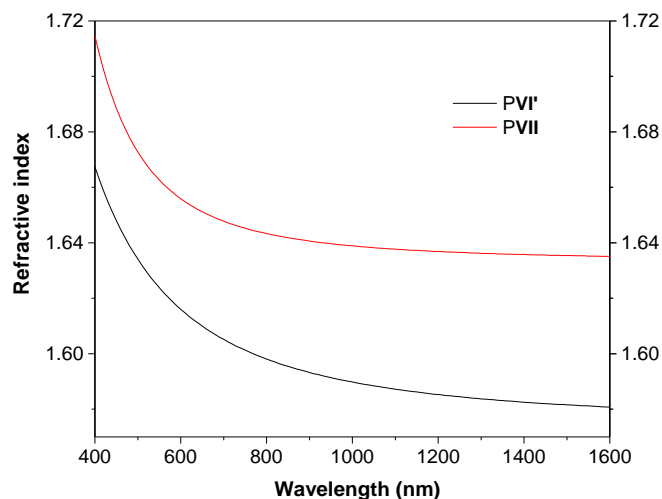

**Figure S25.** Light refraction spectra of thin solid films of PVI' and PVII.

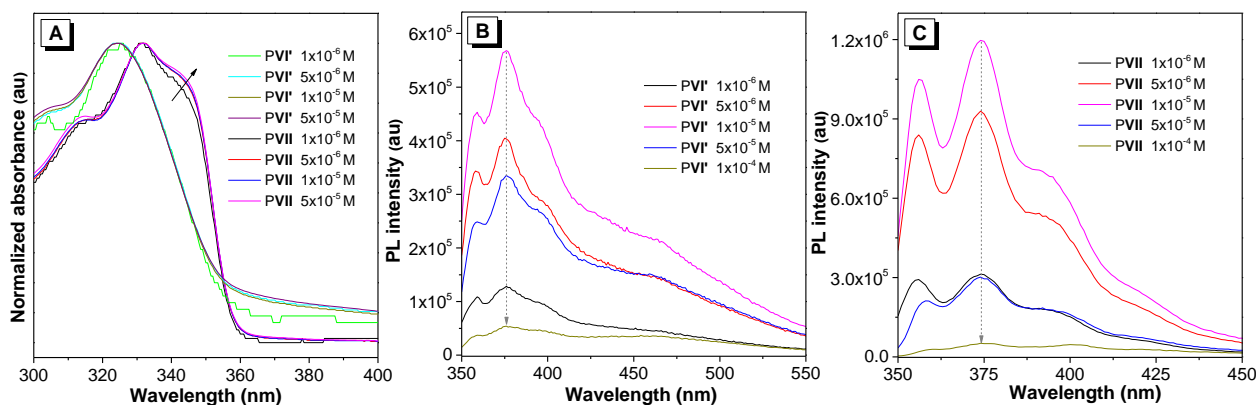

**Figure S26.** UV-vis absorption spectra of PVI' and PVII in THF solutions (A), PL spectra PVI' (B) and PVII (C) in THF solutions.

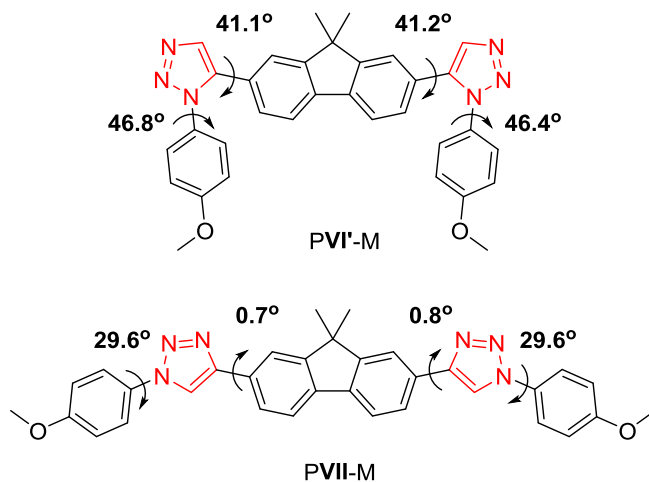

**Figure S27.** Dihedral angles of PVI'-M and PVII-M.

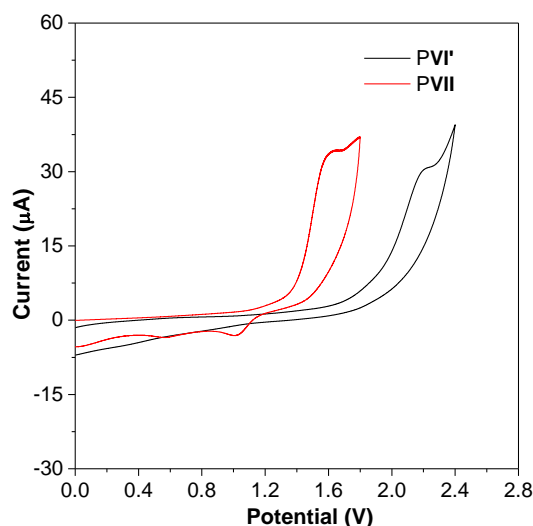

**Figure S28.** Cyclic voltammograms of PVI' and PVII with an Hg/HgCl<sub>2</sub> electrode as the reference electrode and an energy level of ferrocene of -4.40 eV as the internal standard.

**Table S1. Photophysical and Calculated Results as well as Thermal Property of PVI' and PVII**

| entry | $M_w^a$ | $\bar{D}^a$ | $\lambda_{\text{abs}}^b$<br>(nm) | $\Phi_F^c$<br>(%) | $\tau$<br>(ns) | $E_g^d$<br>(eV) | $T_g/T_d$<br>(°C) |
|-------|---------|-------------|----------------------------------|-------------------|----------------|-----------------|-------------------|
| PVI'  | 13 800  | 1.95        | 324                              | 12.6              | 1.48           | 3.52            | 77/228            |
| PVII  | 10 500  | 1.29        | 332                              | 41.6              | 1.30           | 3.47            | 101/308           |

<sup>a</sup>Estimated by APC using THF as an eluant on the basis of a PS calibration;  $M_w$  = weight-average molecular weight; polydispersity index ( $\bar{D}$ ) =  $M_w/M_n$ ;  $M_n$  = number-average molecular weight. <sup>b</sup>In THF solutions ( $10^{-5}$  M). <sup>c</sup>Absolute fluorescence quantum yield in THF solutions ( $10^{-5}$  M). <sup>d</sup>Estimated by optical band gap calculated from the onset of absorption spectra.

## References

- (1) Yuan, W.; Mahtab, F.; Gong, Y.; Yu, Z.; Lu, P.; Tang, Y.; Lam, J. W. Y.; Zhu, C.; Tang, B. Z. Synthesis and Self-Assembly of Tetraphenylethene and Biphenyl Based AIE-Active Triazoles. *J. Mater. Chem.* **2012**, *22*, 10472–10479.
- (2) Liu, Y.; Wang, J.; Huang, D.; Zhang, J.; Guo, S.; Hu, R.; Zhao, Z.; Qin, A.; Tang, B. Z. Synthesis of 1,5-Regioregular Polytriazoles by Efficient NMe<sub>4</sub>OH-Mediated Azide-Alkyne Click Polymerization. *Polym. Chem.* **2015**, *6*, 5545–5549.
- (3) Wang, J.; Mei, J.; Yuan, W.; Lu, P.; Qin, A.; Sun, J. Z.; Ma, Y.; Tang, B. Z. Hyperbranched Polytriazoles with High Molecular Compressibility: Aggregation-Induced Emission and Superamplified Explosive Detection. *J. Mater. Chem.* **2011**, *21*, 4056–4059.

- (4) Yao, B.; Mei, J.; Li, J.; Wang, J.; Wu, H.; Sun, J. Z.; Qin, A.; Tang, B. Z. Catalyst-Free Thiol-Yne Click Polymerization: A Powerful and Facile Tool for Preparation of Functional Poly(vinylene sulfide)s. *Macromolecule* **2014**, *47*, 1325–1333.
- (5) Zhao, E.; Li, H.; Ling, J.; Wu, H.; Wang, J.; Zhang, S.; Lam, J. W. Y.; Sun, J. Z.; Qin, A.; Tang, B. Z. Structure-Dependent Emission of Polytriazoles. *Polym. Chem.* **2014**, *5*, 2301–2308.
